# Supplementary material for: Plasma tPA-Activity and Progression of Cerebral White Matter Hyperintensities in Lacunar Stroke Patients
Source: PubMed Central journal article supplement (PMC4778794; doi:10.1371/journal.pone.0150740), 2016-03-04
Supplement: pone.0150740.s001.pdf [file pone.0150740.s001.pdf]

| registration number | age | sex | tPA-activity | PAI-1  | baseline pWMH | baseline dWMH | progression WMH | progression pWMH | progression dWMH | hypertension | DM | smoking | hypercholestroleamia | 24h MAP at follow-up |
|---------------------|-----|-----|--------------|--------|---------------|---------------|-----------------|------------------|------------------|--------------|----|---------|----------------------|----------------------|
| 1                   | 67  | 1   | 0.37         | 121.49 | 1             | 1             | 0               | 0                | 0                | 1            | 0  | 0       | 1                    | 97.19                |
| 2                   | 47  | 0   | 1.07         | 22.67  | 0             | 0             | 0               | 0                | 0                | 1            | 0  | 1       | 0                    | 92.85                |
| 3                   | 71  | 0   | 0.29         | 34.35  | 0             | 0             | 0               | 0                | 0                | 0            | 1  | 1       | 1                    | 93.33                |
| 4                   | 56  | 0   | 1.44         | 9.33   | 0             | 0             | 0               | 0                | 0                | 0            | 0  | 1       | 1                    | 92.59                |
| 5                   | 47  | 1   | 0.31         | 41.75  | 0             | 0             | 0               | 0                | 0                | 1            | 1  | 1       | 0                    | 140.19               |
| 6                   | 68  | 1   | 1.58         | 31.52  | 0             | 0             | 0               | 0                | 0                | 1            | 0  | 0       | 1                    | 93.69                |
| 7                   | 42  | 0   | 0.27         | 59.78  | 0             | 0             | 0               | 0                | 0                | 0            | 0  | 1       | 1                    | 106.46               |
| 8                   | 50  | 1   | 1.11         | 11.35  | 0             | 0             | 0               | 0                | 0                | 0            | 0  | 1       | 1                    | 84.76                |
| 9                   | 46  | 1   | 0.6          | 33.46  | 0             | 0             | 0               | 0                | 0                | 1            | 0  | 0       | 0                    | 119.15               |
| 10                  | 65  | 0   | 1.06         | 15.92  | 1             | 0             | 0               | 0                | 0                | 0            | 0  | 1       | 1                    | 115.32               |
| 11                  | 67  | 0   | 0.72         | 34.95  | 1             | 0             | 1               | 1                | 0                | 0            | 0  | 0       | 1                    | 94.64                |
| 12                  | 61  | 1   | 1.38         | 15.72  | 0             | 0             | 0               | 0                | 0                | 0            | 0  | 0       | 0                    | 93.93                |
| 13                  | 63  | 1   | 0.33         | 27.12  | 0             | 0             | 1               | 0                | 1                | 1            | 0  | 0       | 1                    | 104.23               |
| 14                  | 54  | 1   | 0.33         | 69.96  | 0             | 0             | 0               | 0                | 0                | 1            | 0  | 1       | 1                    | 102.43               |
| 15                  | 57  | 1   | 0.72         | 69.54  | 0             | 0             | 1               | 0                | 1                | 1            | 0  | 1       | 1                    | 104.99               |
| 16                  | 79  | 0   | 0.22         | 39.2   | 1             | 1             | 1               | 0                | 1                | 1            | 0  | 0       | 1                    | 100.49               |
| 17                  | 83  | 1   | 0.76         | 41.37  | 0             | 0             | 1               | 1                | 0                | 0            | 0  | 0       | 0                    | 101.32               |
| 18                  | 85  | 1   | 0.62         | 78.59  | 0             | 0             | 1               | 0                | 1                | 0            | 0  | 1       | 1                    | 94.17                |
| 19                  | 51  | 1   | 0.49         | 72.46  | 0             | 0             | 0               | 0                | 0                | 0            | 0  | 0       | 1                    | 109.99               |
| 20                  | 61  | 1   | 0.24         | 100.8  | 0             | 0             | 1               | 0                | 1                | 1            | 1  | 1       | 0                    | 97.35                |
| 21                  | 46  | 0   | 0.34         | 123.62 | 0             | 0             | 0               | 0                | 0                | 0            | 0  | 0       | 1                    | 98.65                |
| 22                  | 64  | 1   | 0.43         | 140.52 | 0             | 0             | 0               | 0                | 0                | 1            | 0  | 1       | 1                    | 102.29               |
| 23                  | 64  | 1   | 1.06         | 23.3   | 0             | 0             | 1               | 1                | 0                | 1            | 1  | 0       | 1                    | 112.19               |
| 24                  | 60  | 1   | 0.29         | 179.78 | 0             | 0             | 1               | 0                | 1                | 1            | 0  | 1       | 1                    | 103.9                |
| 25                  | 67  | 0   | 1.06         | 79.43  | 1             | 1             | 1               | 1                | 1                | 1            | 0  | 1       | 1                    |                      |
| 26                  | 67  | 0   | 0.31         | 121.49 | 0             | 1             | 1               | 0                | 1                | 1            | 0  | 0       | 1                    |                      |
| 27                  | 77  | 0   | 1.71         | 18.71  | 1             | 1             | 1               | 1                | 1                | 0            | 0  | 0       | 1                    | 90.03                |
| 28                  | 81  | 1   | 1.71         | 6.33   | 1             | 1             | 1               | 1                | 1                | 0            | 0  | 1       | 1                    | 91.33                |
| 29                  | 68  | 0   | 1.26         | 33.12  | 0             | 0             | 1               | 1                | 1                | 1            | 0  | 1       | 1                    | 102.45               |
| 30                  | 76  | 1   | 1.33         | 12.36  | 0             | 0             | 0               | 0                | 0                | 1            | 0  | 1       | 0                    | 100.68               |
| 31                  | 74  | 1   | 1.24         | 33.23  | 1             | 1             | 0               | 0                | 0                | 0            | 0  | 0       | 1                    | 91.79                |
| 32                  | 52  | 1   | 0.71         | 29.59  | 0             | 0             | 0               | 0                | 0                | 1            | 0  | 1       | 0                    | 125.51               |
| 33                  | 68  | 1   | 0.29         | 17.64  | 0             | 0             | 1               | 1                | 1                | 1            | 0  | 0       | 0                    | 112.75               |
| 34                  | 60  | 0   | 0.12         | 168.52 | 0             | 0             | 1               | 1                | 0                | 1            | 0  | 0       | 1                    | 90.34                |
| 35                  | 66  | 1   | 1.8          | 11.04  | 1             | 1             | 1               | 1                | 1                | 1            | 1  | 0       | 1                    | 91.65                |
| 36                  | 68  | 1   | 0.94         | 8.98   | 0             | 0             | 0               | 0                | 0                | 1            | 0  | 0       | 0                    | 129.42               |
| 37                  | 73  | 0   | 0.36         | 83.09  | 0             | 1             | 1               | 0                | 1                | 0            | 0  | 0       | 1                    | 96.07                |
| 38                  | 63  | 0   | 0.58         | 53.84  | 0             | 0             | 0               | 0                | 0                | 1            | 0  | 1       | 0                    | 97.33                |
| 39                  | 74  | 1   | 0.39         | 70.6   | 1             | 1             | 1               | 1                | 1                | 0            | 0  | 0       | 1                    | 102.02               |
| 40                  | 54  | 1   | 0.83         | 120.42 | 0             | 0             | 0               | 0                | 0                | 0            | 0  | 1       | 1                    | 91.29                |
| 41                  | 77  | 1   | 0.18         | 20.46  | 1             | 1             | 1               | 1                | 1                | 1            | 0  | 0       | 1                    | 94.13                |
| 42                  | 64  | 1   | 1.04         | 5.06   | 1             | 1             | 0               | 0                | 1                | 1            | 0  | 1       | 1                    | 104.71               |
| 43                  | 64  | 1   | 0.13         | 195.02 | 0             | 0             | 0               | 0                | 0                | 0            | 0  | 1       | 0                    | 99.02                |
| 44                  | 77  | 0   | 0.13         | 229.2  | 0             | 0             | 0               | 0                | 0                | 1            | 0  | 0       | 1                    | 93.51                |
| 45                  | 51  | 1   | 1.99         | 5.49   | 0             | 0             | 1               | 0                | 1                | 1            | 1  | 0       | 1                    | 108.53               |
| 46                  | 52  | 1   | 0.62         | 58.15  | 0             | 1             | 1               | 0                | 1                | 0            | 0  | 1       | 0                    | 98.84                |
| 47                  | 72  | 1   | 0.68         | 17.02  | 0             | 0             | 0               | 0                | 0                | 0            | 0  | 0       | 1                    | 105.6                |
| 48                  | 76  | 1   | 0.27         | 27.89  | 1             | 1             | 0               | 0                | 0                | 1            | 0  | 1       | 1                    | 88.72                |
| 49                  | 63  | 1   | 0.49         | 86.9   | 0             | 1             | 0               | 0                | 0                | 1            | 0  | 1       | 1                    | 112.13               |
| 50                  | 77  | 1   | 0.32         | 44.45  | 0             | 0             | 0               | 0                | 0                | 1            | 1  | 1       | 1                    | 103.41               |
| 51                  | 79  | 0   | 1.68         | 19.99  | 1             | 1             | 1               | 1                | 0                | 1            | 0  | 0       | 1                    | 100.65               |
| 52                  | 79  | 1   | 0.84         | 14.81  | 1             | 1             | 0               | 0                | 0                | 1            | 0  | 1       | 0                    | 100.5                |
| 53                  | 75  | 0   | 1.25         | 38.78  | 0             | 0             | 0               | 0                | 0                | 0            | 0  | 1       | 1                    | 103.47               |
| 54                  | 71  | 1   | 1.17         | 10.16  | 1             | 0             | 1               | 1                | 0                | 1            | 1  | 1       | 1                    | 106.43               |

|     |    |   |      |        |   |   |   |   |   |   |   |   |   |        |
|-----|----|---|------|--------|---|---|---|---|---|---|---|---|---|--------|
| 55  | 79 | 1 | 0.48 | 20.51  | 1 | 1 | 1 | 1 | 1 | 1 | 1 | 0 | 1 | 110.46 |
| 56  | 81 | 0 | 2.1  | 11.92  | 0 | 0 | 1 | 0 | 1 | 1 | 0 | 0 | 0 | 75.4   |
| 57  | 53 | 0 | 2.1  | 7.67   | 0 | 0 | 1 | 1 | 1 | 0 | 0 | 1 | 1 | 114.34 |
| 58  | 80 | 1 | 0.79 | 37.93  | 1 | 1 | 1 | 1 | 1 | 1 | 1 | 0 | 0 | 118.5  |
| 59  | 68 | 0 | 0.35 | 17.55  | 0 | 1 | 1 | 1 | 1 | 0 | 0 | 0 | 1 | 108.21 |
| 60  | 79 | 0 | 0.72 | 22.36  | 0 | 0 | 1 | 1 | 0 | 0 | 0 | 1 | 1 | 107.69 |
| 61  | 70 | 1 | 0.48 | 42.94  | 1 | 1 | 1 | 1 | 1 | 1 | 0 | 1 | 1 | 98.25  |
| 62  | 74 | 1 | 2.05 | 19.93  | 1 | 1 | 1 | 0 | 1 | 1 | 0 | 0 | 1 | 111.11 |
| 63  | 69 | 0 | 0.49 | 34.55  | 0 | 0 | 1 | 0 | 1 | 1 | 1 | 0 | 1 | 96.32  |
| 64  | 77 | 1 | 0.69 | 19.47  | 0 | 0 | 0 | 0 | 0 | 1 | 0 | 1 | 1 | 110.23 |
| 65  | 40 | 0 | 0.24 | 84.35  | 0 | 0 | 0 | 0 | 0 | 1 | 0 | 0 | 1 |        |
| 66  | 50 | 0 | 1.33 | 10.09  | 1 | 1 | 0 | 0 | 0 | 0 | 0 | 1 | 1 | 91.75  |
| 67  | 67 | 0 | 1.85 | 19.9   | 0 | 0 | 0 | 0 | 0 | 1 | 0 | 0 | 0 | 100.45 |
| 68  | 52 | 1 | 0.14 | 117.21 | 0 | 0 | 0 | 0 | 0 | 1 | 0 | 1 | 1 | 90.43  |
| 69  | 59 | 1 | 0.39 | 35.36  | 0 | 0 | 0 | 0 | 0 | 1 | 0 | 0 | 1 | 92.06  |
| 70  | 47 | 0 | 0.43 | 78.7   | 0 | 0 | 0 | 0 | 0 | 1 | 0 | 0 | 1 | 94.86  |
| 71  | 78 | 0 | 2.06 | 9.59   | 1 | 1 | 1 | 1 | 1 | 1 | 0 | 0 | 1 | 107.7  |
| 72  | 56 | 1 | 0.69 | 56.49  | 0 | 0 | 1 | 1 | 0 | 1 | 0 | 1 | 0 | 111.62 |
| 73  | 45 | 1 | 0.58 | 39.47  | 0 | 0 | 0 | 0 | 0 | 0 | 0 | 1 | 1 |        |
| 74  | 60 | 0 | 0.24 | 96.58  | 1 | 0 | 1 | 0 | 1 | 1 | 0 | 1 | 1 | 84.58  |
| 75  | 47 | 0 | 0.77 | 37.1   | 0 | 0 | 0 | 0 | 0 | 1 | 0 | 0 | 1 | 90.65  |
| 76  | 65 | 0 | 1.41 | 22.99  | 0 | 1 | 1 | 1 | 1 | 1 | 0 | 0 | 1 | 102.47 |
| 77  | 65 | 1 | 2.1  | 34.07  | 0 | 1 | 1 | 1 | 1 | 1 | 0 | 0 | 1 | 108.25 |
| 78  | 50 | 1 | 0.31 | 69.54  | 0 | 0 | 0 | 0 | 0 | 1 | 0 | 1 | 1 | 102.43 |
| 79  | 63 | 1 | 0.74 | 21.59  | 0 | 0 | 1 | 0 | 1 | 0 | 0 | 0 | 0 | 96.76  |
| 80  | 71 | 1 | 1.62 | 10.4   | 1 | 1 | 1 | 0 | 1 | 1 | 1 | 0 | 0 | 102.44 |
| 81  | 65 | 0 | 0.62 | 60.03  | 0 | 0 | 0 | 0 | 0 | 1 | 0 | 0 | 1 |        |
| 82  | 60 | 0 | 0.4  | 20.51  | 0 | 0 | 1 | 0 | 1 | 1 | 1 | 0 | 1 | 86     |
| 83  | 56 | 0 | 0.73 | 79.65  | 0 | 0 | 0 | 0 | 0 | 0 | 0 | 1 | 0 | 100.13 |
| 84  | 67 | 0 | 0.48 | 139.47 | 0 | 0 | 0 | 0 | 0 | 1 | 0 | 0 | 1 | 98.52  |
| 85  | 60 | 1 | 0.57 | 43.45  | 0 | 0 | 0 | 0 | 0 | 1 | 1 | 0 | 1 | 105.91 |
| 86  | 46 | 0 | 0.3  | 99.87  | 0 | 0 | 1 | 0 | 1 | 1 | 0 | 0 | 0 | 106.45 |
| 87  | 40 | 1 | 0.29 | 156.15 | 0 | 0 | 0 | 0 | 0 | 1 | 0 | 0 | 1 | 104.2  |
| 88  | 61 | 1 | 0.82 | 14.13  | 1 | 0 | 1 | 1 | 1 | 1 | 0 | 1 | 1 | 93.51  |
| 89  | 61 | 1 | 0.41 | 38.99  | 0 | 0 | 0 | 0 | 0 | 1 | 0 | 0 | 1 | 104.27 |
| 90  | 49 | 0 | 1.33 | 11.52  | 0 | 1 | 1 | 1 | 1 | 0 | 0 | 1 | 0 | 108.86 |
| 91  | 77 | 0 | 0.56 | 29.93  | 1 | 1 | 1 | 0 | 1 | 1 | 0 | 0 | 0 | 99.04  |
| 92  | 74 | 0 | 2.01 | 6.68   | 1 | 1 | 1 | 1 | 1 | 0 | 0 | 0 | 1 | 90.11  |
| 93  | 65 | 0 | 0.81 | 12.01  | 1 | 1 | 1 | 1 | 1 | 1 | 0 | 1 | 1 | 122.46 |
| 94  | 62 | 1 | 0.31 | 49.6   | 1 | 0 | 1 | 1 | 0 | 1 | 0 | 1 | 1 | 115.72 |
| 95  | 55 | 1 | 0.36 | 43.64  | 0 | 0 | 0 | 0 | 0 | 0 | 0 | 0 | 0 | 90.16  |
| 96  | 42 | 1 | 1.07 | 6.53   | 0 | 0 | 0 | 0 | 0 | 0 | 1 | 1 | 1 | 106.52 |
| 97  | 73 | 0 | 0.58 | 66.06  | 0 | 0 | 0 | 0 | 0 | 1 | 1 | 0 | 1 |        |
| 98  | 45 | 1 | 0.38 | 43.69  | 0 | 0 | 0 | 0 | 0 | 1 | 0 | 0 | 0 | 99.12  |
| 99  | 74 | 1 | 1.11 | 71.85  | 0 | 0 | 1 | 1 | 1 | 1 | 0 | 1 | 1 | 96.73  |
| 100 | 79 | 1 | 1.17 | 9.68   | 0 | 0 | 0 | 0 | 0 | 0 | 0 | 0 | 0 | 104.74 |
| 101 | 40 | 1 | 0.26 | 33.05  | 0 | 0 | 0 | 0 | 0 | 0 | 0 | 0 | 1 | 102.18 |
| 102 | 70 | 1 | 1.06 | 7.19   | 0 | 0 | 0 | 0 | 0 | 1 | 0 | 0 | 1 | 108.33 |
| 103 | 80 | 0 | 0.7  | 10.42  | 1 | 1 | 1 | 0 | 1 | 1 | 0 | 0 | 1 | 93.26  |
| 104 | 65 | 1 | 0.86 | 22.87  | 0 | 0 | 1 | 0 | 1 | 1 | 0 | 0 | 1 | 104.23 |
| 105 | 36 | 0 | 1.7  | 94.37  | 0 | 0 | 0 | 0 | 0 | 1 | 0 | 1 | 1 | 102.64 |
| 106 | 64 | 1 | 1.23 | 27.5   | 1 | 0 | 1 | 1 | 0 | 1 | 0 | 0 | 1 | 108.56 |
| 107 | 59 | 1 | 0.54 | 18.42  | 0 | 0 | 0 | 0 | 0 | 0 | 0 | 0 | 1 | 102.65 |
| 108 | 67 | 1 | 1.05 | 26.25  | 1 | 0 | 1 | 1 | 0 | 0 | 0 | 1 | 1 | 107.43 |
| 109 | 60 | 0 | 0.37 | 37.71  | 1 | 1 | 1 | 0 | 1 | 0 | 0 | 1 | 0 | 93.15  |

|     |    |   |      |        |   |   |   |   |   |   |   |   |   |        |
|-----|----|---|------|--------|---|---|---|---|---|---|---|---|---|--------|
| 110 | 52 | 1 | 0.38 | 83.22  | 0 | 0 | 0 | 0 | 0 | 0 | 0 | 1 | 1 | 100.3  |
| 111 | 54 | 1 | 1.13 | 30.43  | 0 | 0 | 0 | 0 | 0 | 1 | 0 | 0 | 1 | 102.41 |
| 112 | 68 | 1 | 0.52 | 20.7   | 1 | 1 | 0 | 0 | 0 | 1 | 0 | 0 | 1 | 98.73  |
| 113 | 65 | 1 | 1.37 | 112.91 | 0 | 0 | 1 | 0 | 1 | 0 | 0 | 1 | 1 | 102.91 |
| 114 | 49 | 1 | 0.23 | 6.31   | 0 | 0 | 0 | 0 | 0 | 1 | 0 | 0 | 0 | 108.36 |
| 115 | 66 | 1 | 0.41 | 126.81 | 0 | 0 | 0 | 0 | 0 | 1 | 0 | 0 | 0 | 91.4   |
| 116 | 49 | 1 | 0.45 | 42.88  | 0 | 0 | 1 | 0 | 1 | 1 | 0 | 1 | 1 |        |
| 117 | 47 | 0 | 0.37 | 34.95  | 0 | 0 | 0 | 0 | 0 | 1 | 0 | 0 | 1 | 94.57  |
| 118 | 69 | 0 | 0.67 | 44.79  | 0 | 0 | 0 | 0 | 0 | 1 | 0 | 0 | 1 | 94.73  |
| 119 | 45 | 0 | 0.36 | 32.77  | 0 | 0 | 0 | 0 | 0 | 1 | 0 | 0 | 1 | 102.03 |
| 120 | 63 | 1 | 0.88 | 6.3    | 0 | 0 | 0 | 0 | 0 | 0 | 0 | 0 | 0 | 82.95  |
| 121 | 53 | 0 | 1.53 | 6.3    | 0 | 1 | 1 | 0 | 1 | 1 | 0 | 0 | 1 | 99.75  |
| 122 | 53 | 1 | 0.34 | 53.96  | 0 | 0 | 0 | 0 | 0 | 0 | 0 | 1 | 1 | 110.12 |
| 123 | 65 | 1 | 0.68 | 45.99  | 0 | 1 | 1 | 0 | 1 | 1 | 1 | 0 | 1 | 89.3   |
| 124 | 73 | 1 | 0.28 | 163.38 | 0 | 0 | 1 | 1 | 1 | 1 | 0 | 1 | 1 | 88.48  |
| 125 | 33 | 1 | 0.03 | 26.05  | 0 | 0 | 1 | 0 | 1 | 0 | 0 | 0 | 1 | 93.86  |
| 126 | 57 | 1 | 0.82 | 6.3    | 0 | 1 | 0 | 0 | 0 | 1 | 0 | 0 | 1 | 90.64  |
| 127 | 55 | 0 | 0.65 | 6.3    | 0 | 0 | 0 | 0 | 0 | 1 | 0 | 0 | 1 | 88.67  |

sex: 0 = female  
1 = male

other: 0 = no  
1 = yes
